# Supplementary material
Source: Springer Nature journal article supplement (https://www.springermedizin.de/resource/supplementary/12971_2013_229_MOESM3_ESM.docx/9595096)

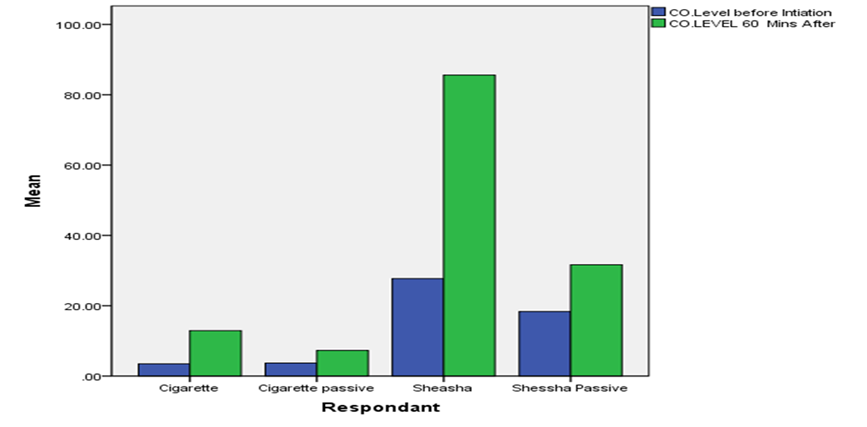


Graph 1: eCO values at initiation and after 60 minutes of completion of smoking. Paired T test used. p<0.005

Supplement: MOESM3 [file 9595096]
